# Supplementary material for: Characterizing the microbiomes of Antarctic sponges: a functional metagenomic approach
Source: PubMed Central journal article supplement (PMC6971038; doi:10.1038/s41598-020-57464-2), 2020-01-20
Supplement: 41598_2020_57464_MOESM1_ESM.pdf [file 41598_2020_57464_MOESM1_ESM.pdf]

## **Manuscript**

**Characterizing the microbiomes of Antarctic sponges: a functional metagenomic approach.**

**Mario Moreno-Pino, Antonia Cristi, James Gillooly and Nicole Trefault**

**Supplementary information**

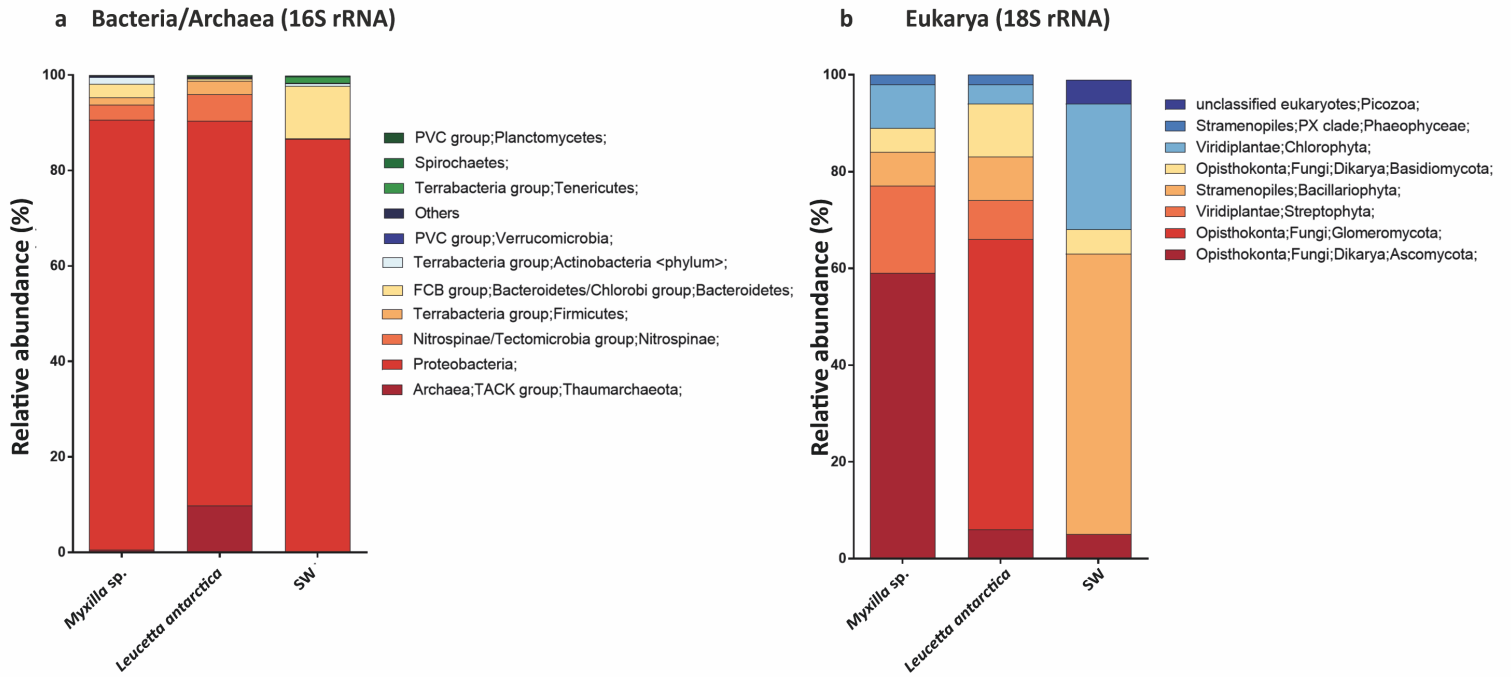

**Supplementary Figure 1.** Microbial composition based on ribosomal genes obtained from the metagenomes from the Antarctic sponge- associated and SW communities. Taxonomic composition was assigned to phylum level based on the Lowest Common Ancestor algorithm (LCA), implemented in MEGAN5. Taxonomic classification for Bacteria/Archaea is shown in (a) and for Eukarya domain in (b).

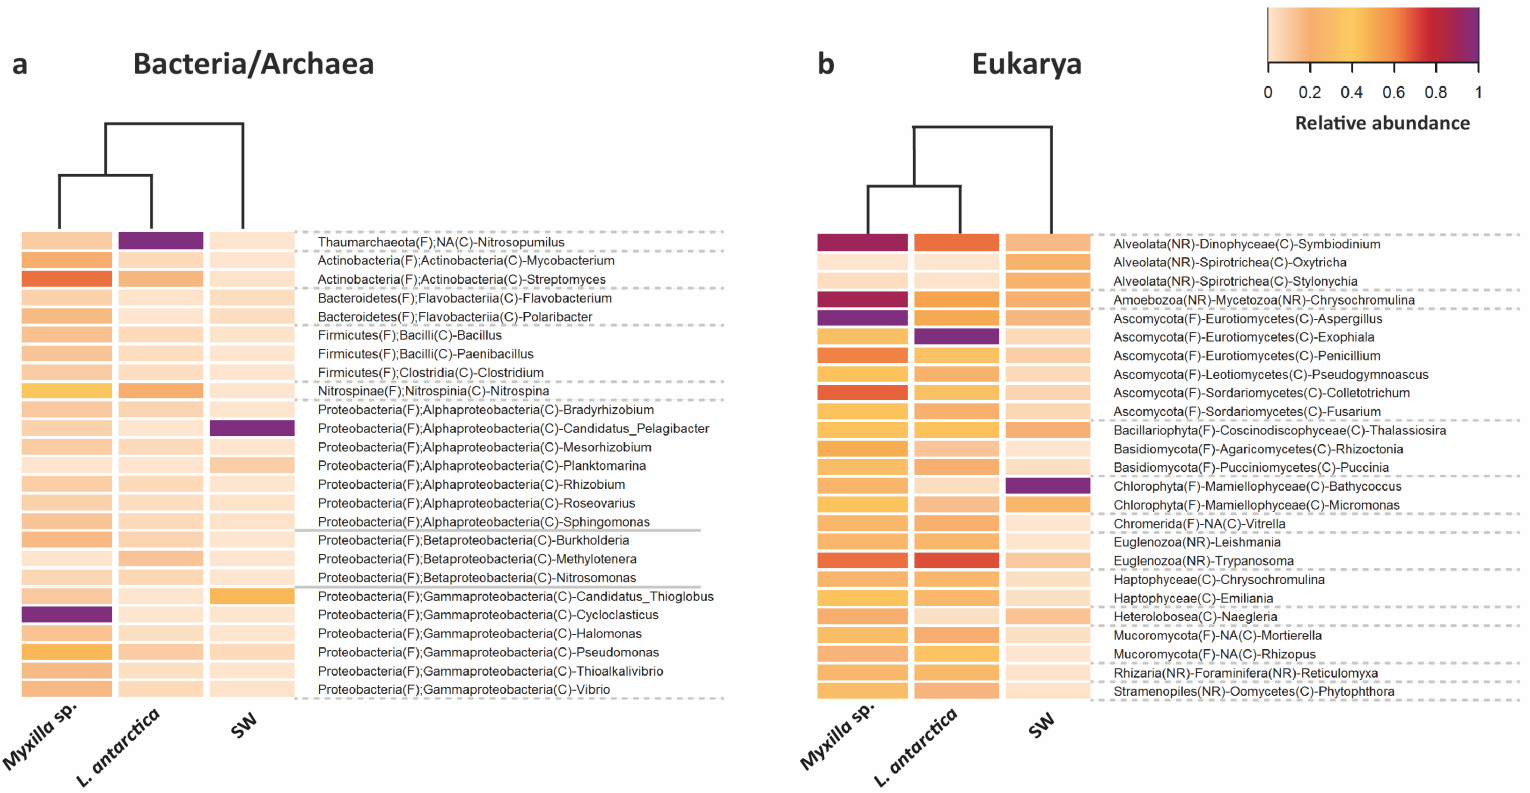

**Supplementary Figure 2.** Microbial composition at genus level from the Antarctic sponge-associated and SW communities. Taxonomic classification for Bacteria/Archaea is shown in (a) and for Eukarya domain in (b).

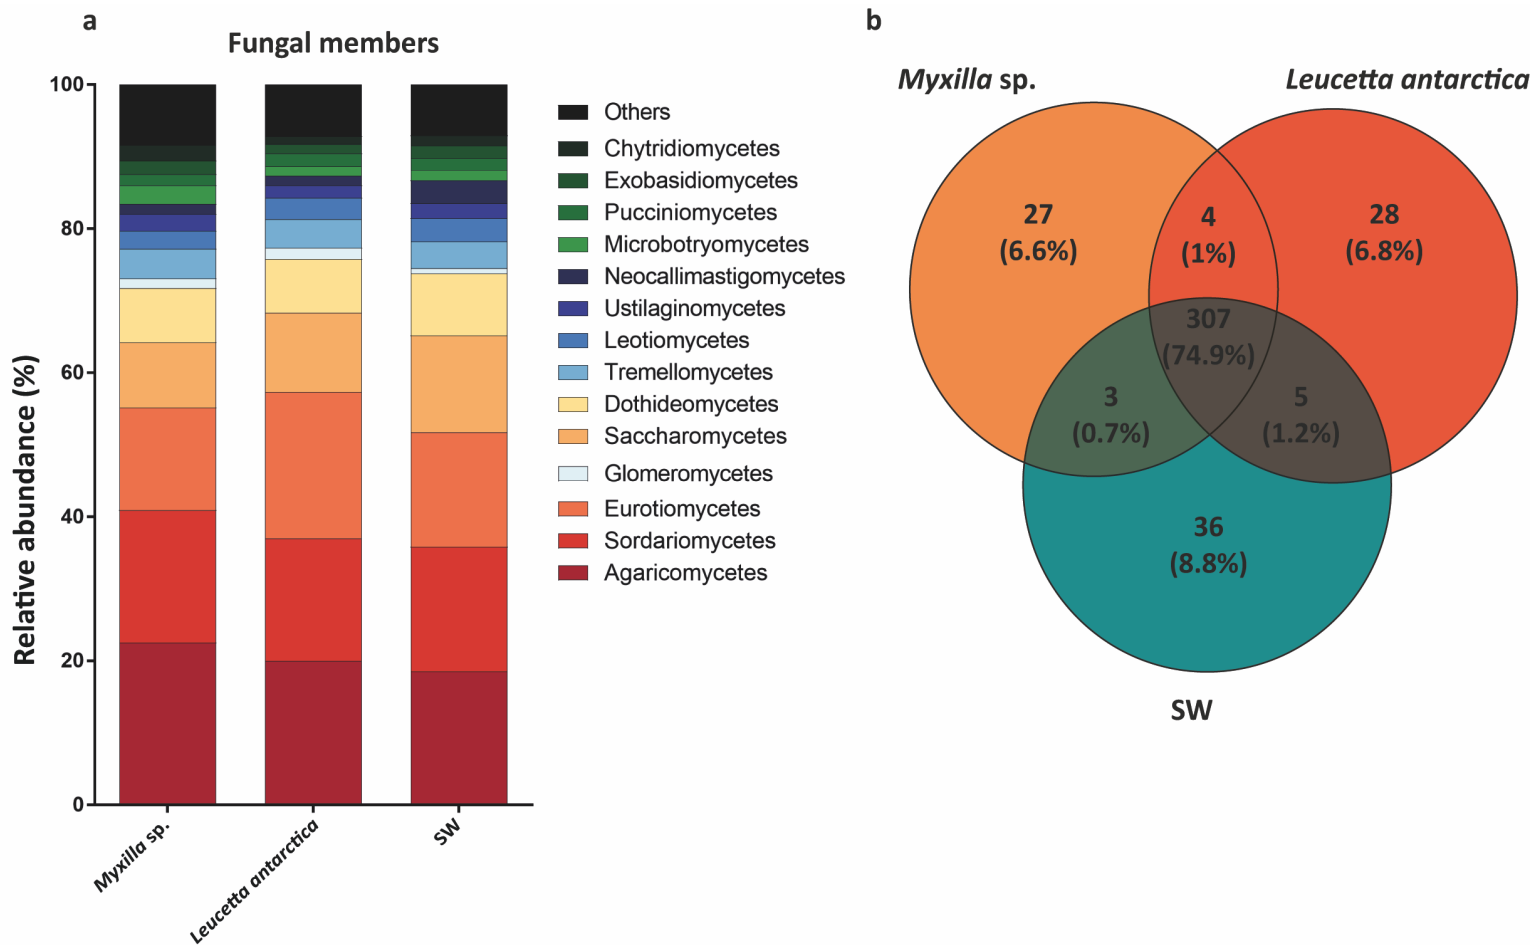

**Supplementary Figure 3.** Fungal microbial composition at genus level of the Antarctic sponge-associated and SW communities. (a) Relative abundance of fungal groups and (b) shared and unique fungal genera found in the metagenomes.

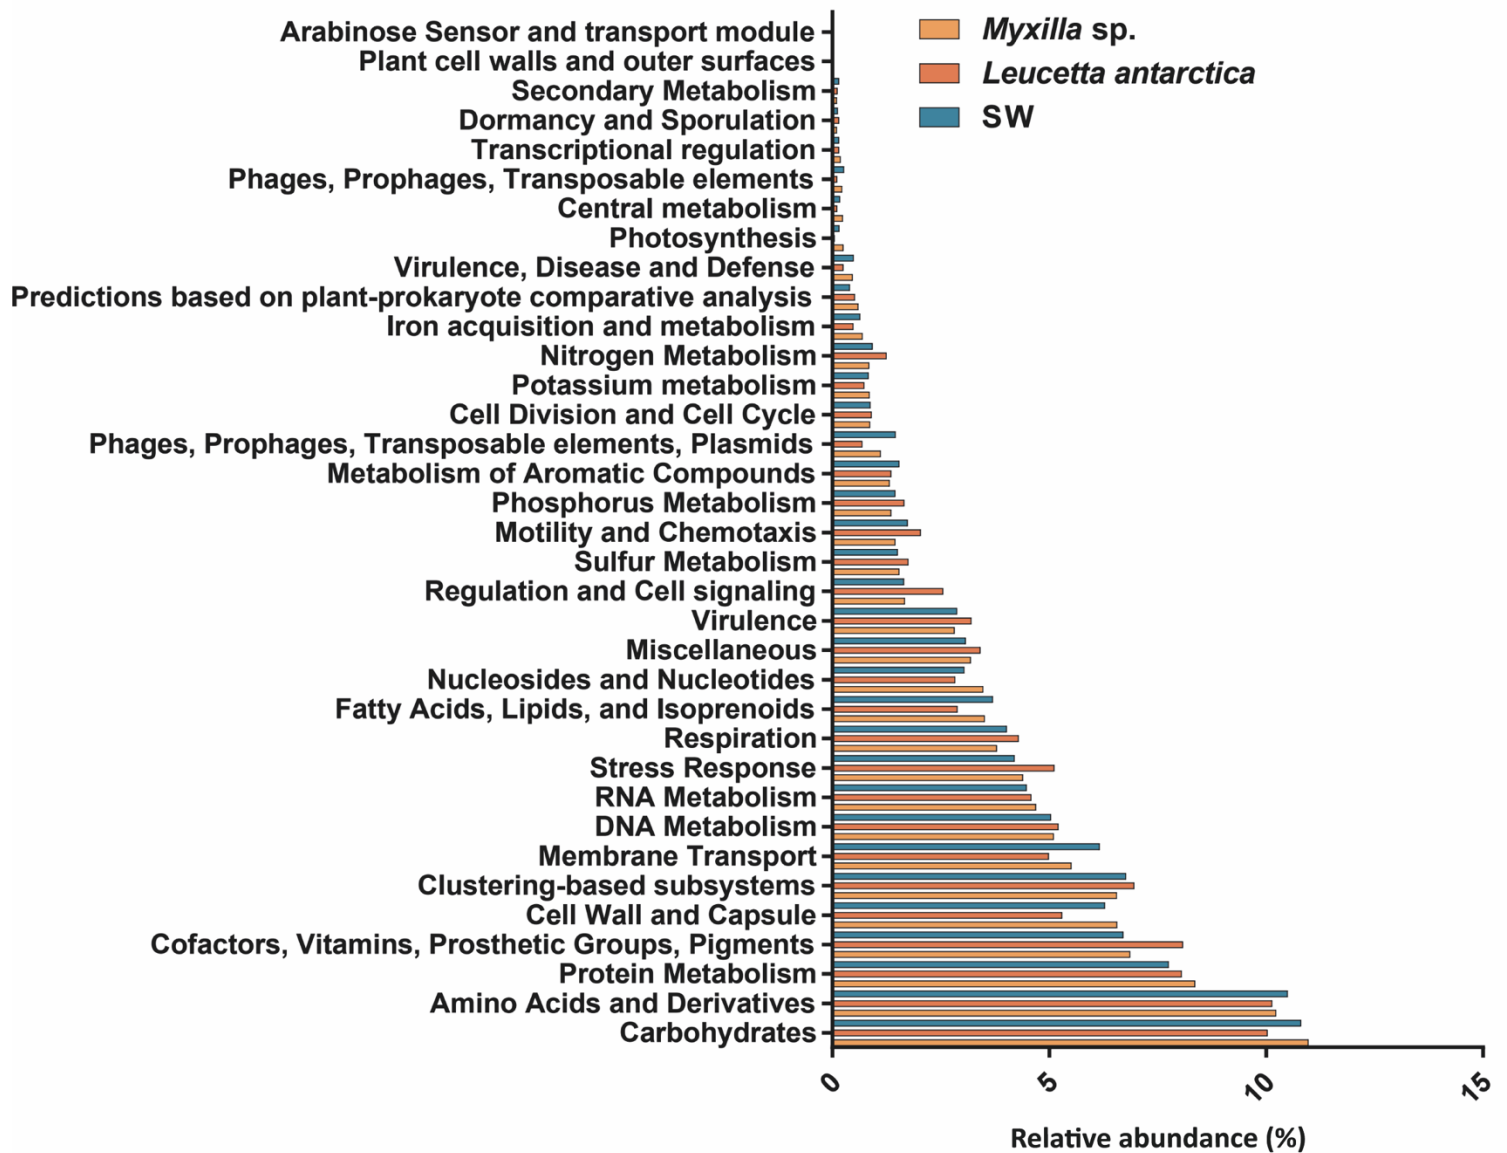

**Supplementary Figure 4.** Relative abundance of SEED categories between the Antarctic sponge-associated and SW communities. Classification of proteins annotated for *Myxilla* sp. and *L. antarctica* microbiomes and for the SW metagenome.

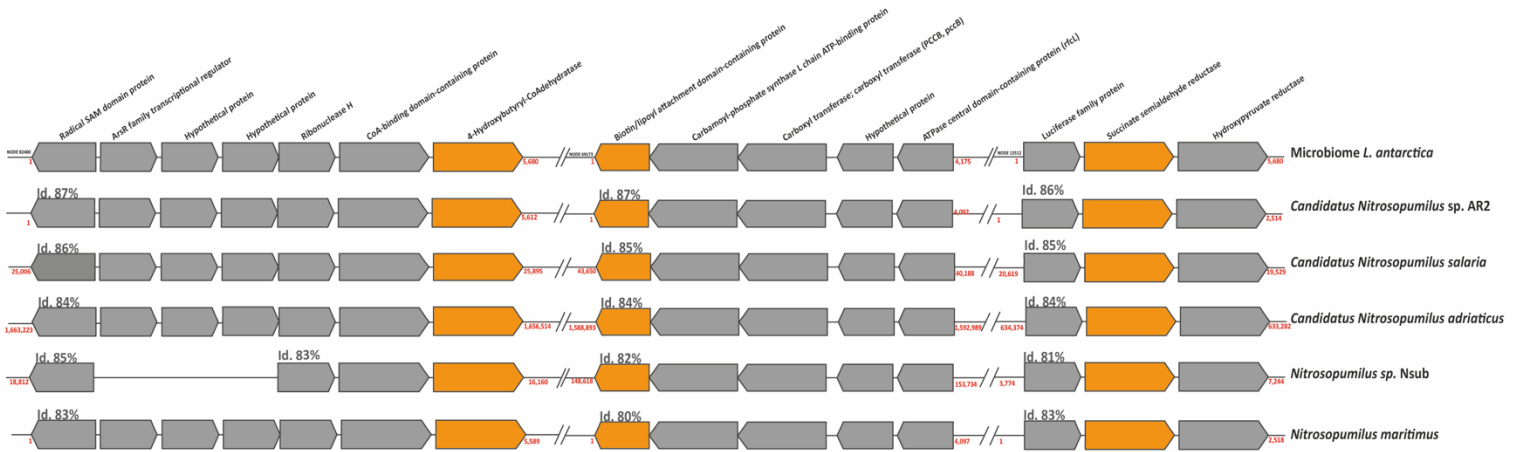

**Supplementary Figure 5.** Synteny analysis for the cluster of key genes related to the 3HP/4HB cycle from the *L. antarctica* microbiome. The schematic representation shows the comparison of the contigs generated from the *L. antarctica* microbiome and five genomes belonging to *Nitrosopumilus* sp. Key genes are shown in orange. Percent of identity are shown above each cluster of genes analyzed.

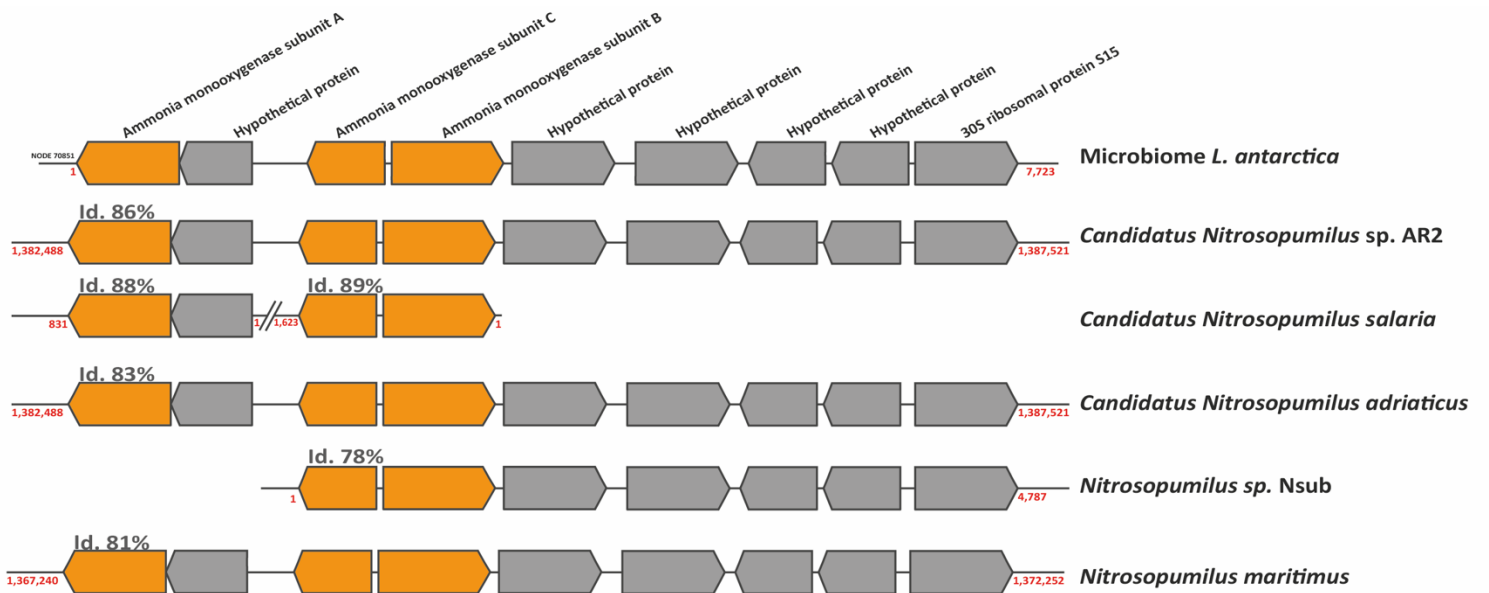

**Supplementary Figure 6.** Synteny analysis for the cluster of key genes related to ammonia oxidation from *L. antarctica* microbiome. The schematic representation shows the comparison of the contigs generated from the *L. antarctica* microbiome and five genomes belonging to *Nitrosopumilus* sp. Key genes are shown in orange. Percent of identity are shown above each cluster of genes analyzed.
